# Supplementary material for: Volatiles from Different Instars of Honeybee Worker Larvae and Their Food
Source: MDPI journal article supplement (doi:10.3390/insects10040118), 2019-04-25
Supplement: s1 [file s1]

**Table S1.** Linearity of response for standards. Calibration fitting:  $y = kx + m$  <sup>a</sup>.

| Compound                | Linear Range<br>(ng) | Slope<br>(k, Mean $\pm$ SD <sup>b</sup> , $n = 3$ ) | Intercept<br>(m, Mean $\pm$ SD <sup>b</sup> , $n = 3$ ) | Regression<br>( $r^2$ , $n = 6$ ) | LOD <sup>c</sup><br>(ng) | LOQ <sup>d</sup><br>(ng) | Codes <sup>e</sup> of the Compounds<br>Calculated by This Curve |
|-------------------------|----------------------|-----------------------------------------------------|---------------------------------------------------------|-----------------------------------|--------------------------|--------------------------|-----------------------------------------------------------------|
| Aldehyde                |                      |                                                     |                                                         |                                   |                          |                          |                                                                 |
| Octanal                 | 0.004–40             | 0.047 $\pm$ 0.0019                                  | 0.01 $\pm$ 0.0008                                       | 0.99982                           | 0.0003                   | 0.0011                   | a1, a2                                                          |
| Decanal                 | 0.0041–41            | 0.096 $\pm$ 0.0027                                  | 0.007 $\pm$ 0.0002                                      | 0.9974                            | 0.0004                   | 0.0014                   | a3                                                              |
| Ester                   |                      |                                                     |                                                         |                                   |                          |                          |                                                                 |
| Methyl tridecanoate     | 0.0044–44            | 0.168 $\pm$ 0.0047                                  | 0.019 $\pm$ 0.0041                                      | 0.9994                            | 0.00048                  | 0.0016                   | e1                                                              |
| Hydrocarbon             |                      |                                                     |                                                         |                                   |                          |                          |                                                                 |
| Tetradecane             | 0.0017–17            | 0.097 $\pm$ 0.0061                                  | 0.0063 $\pm$ 0.00059                                    | 0.9997                            | 0.00039                  | 0.0013                   | h1, h2, h3                                                      |
| Ketone                  |                      |                                                     |                                                         |                                   |                          |                          |                                                                 |
| 6-Methyl-5-hepten-2-one | 0.0038–38            | 0.277 $\pm$ 0.0005                                  | 0.08 $\pm$ 0.0015                                       | 0.9992                            | 0.00036                  | 0.0012                   | k1                                                              |
| Terpenoid               |                      |                                                     |                                                         |                                   |                          |                          |                                                                 |
| (E)- $\beta$ -Ocimene   | 0.005–50             | 0.282 $\pm$ 0.005                                   | 0.080 $\pm$ 0.008                                       | 0.9993                            | 0.00102                  | 0.0034                   | t1, t2, t3, t4, t5, t6, t7                                      |

<sup>a</sup> In the regression equation  $y = kx + m$ ,  $y$  refers to the peak area ratio of target compound to internal standard,  $x$  is the concentration ratio of target compound to internal standard,  $r^2$  is the correlation coefficient of the equation; <sup>b</sup> Standard deviation is abbreviated as SD; <sup>c</sup> Limit of detection,  $S/N = 3$ ; <sup>d</sup> Limit of quantitation,  $S/N = 10$ ; <sup>e</sup> The codes correspond to the volatile codes listed in Table 1.
